# Supplementary material
Source: PubMed Central journal article supplement (PMC4326867)
Supplement: acel0013-0019-sd1.pdf [file acel0013-0019-sd1.pdf]

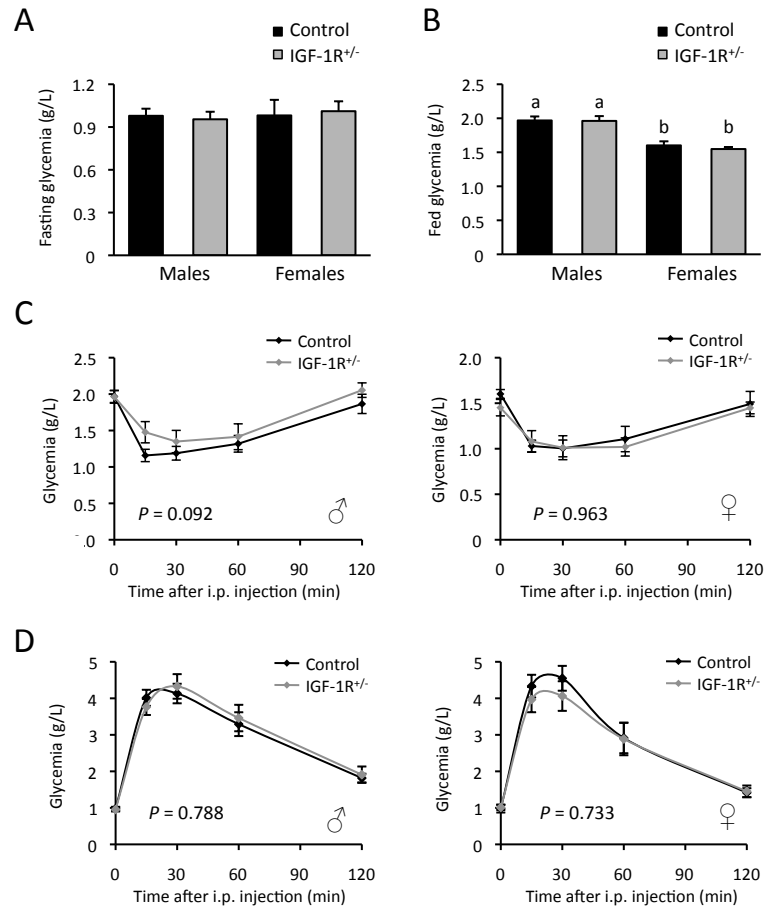

**Supplementary Figure S1.** Glucose homeostasis in 4- to 6-month-old B6 IGF-1R<sup>+/-</sup> mice. **(A)** Fasting glycemia was similar in all 4 groups. N = 7-9 per group,  $P = 0.956$ , one-way ANOVA. **(B)** Glycemia in the fed state was significantly different in males and females, with no difference between control and IGF-1R<sup>+/-</sup> mice. Means labeled *a* are significantly different from *b*;  $P < 0.001$ , one-way ANOVA with Bonferroni's *post hoc* test; N = 7-9 per group. **(C)** Glucose tolerance test (GTT) and **(D)** insulin tolerance test (ITT) in 4-6 month old mice revealed normal glucose regulation in IGF-1R<sup>+/-</sup> mice. Left panel, males; right panel, females. Glucose (2 g/kg body weight) or insulin (1 U/kg) was injected i.p. at  $T_0$  and glycemia measured at  $T_0$ , 15, 30, 60 and 120 min. Differences at each time point and individual area under curve (AUC) were evaluated using Student's *t*-test and were not statistically significant.  $P$  value from area comparison is shown on each graph. N = 7-9 per group. Error bars represent S.E.M.
